# Supplementary material
Source: Springer Nature journal article supplement (https://www.springermedizin.de/resource/supplementary/12961_2005_25_MOESM1_ESM.pdf/9571304)
Supplement: MOESM1 [file 9571304]

Health Care Facilities, Manpower, and Services [N02]

Health Manpower [N02.350]

Health Personnel [N02.360] +

Health Promotion [N02.370] +

Health Services [N02.421] +

Health Care Economics and Organizations [N03]

Health Services Administration [N04]

Health Care Quality, Access, and Evaluation [N05]
